# Supplementary material for: DAZL Regulates Germ Cell Survival through a Network of PolyA-Proximal mRNA Interactions
Source: PubMed Central journal article supplement — Cell Rep. Author manuscript; Available in PMC 2019 Nov 26. (PMC6878787; doi:10.1016/j.celrep.2018.10.012), 2018-10-30
Supplement: NIHMS1511995-supplement-1.pdf [file NIHMS1511995-supplement-1.pdf]

**Cell Reports, Volume 25**

**Supplemental Information**

**DAZL Regulates Germ Cell Survival  
through a Network of PolyA-Proximal  
mRNA Interactions**

**Leah L. Zagore, Thomas J. Sweet, Molly M. Hannigan, Sebastien M. Weyn-Vanhentenryck, Raul Jobava, Maria Hatzoglou, Chaolin Zhang, and Donny D. Licatalosi**

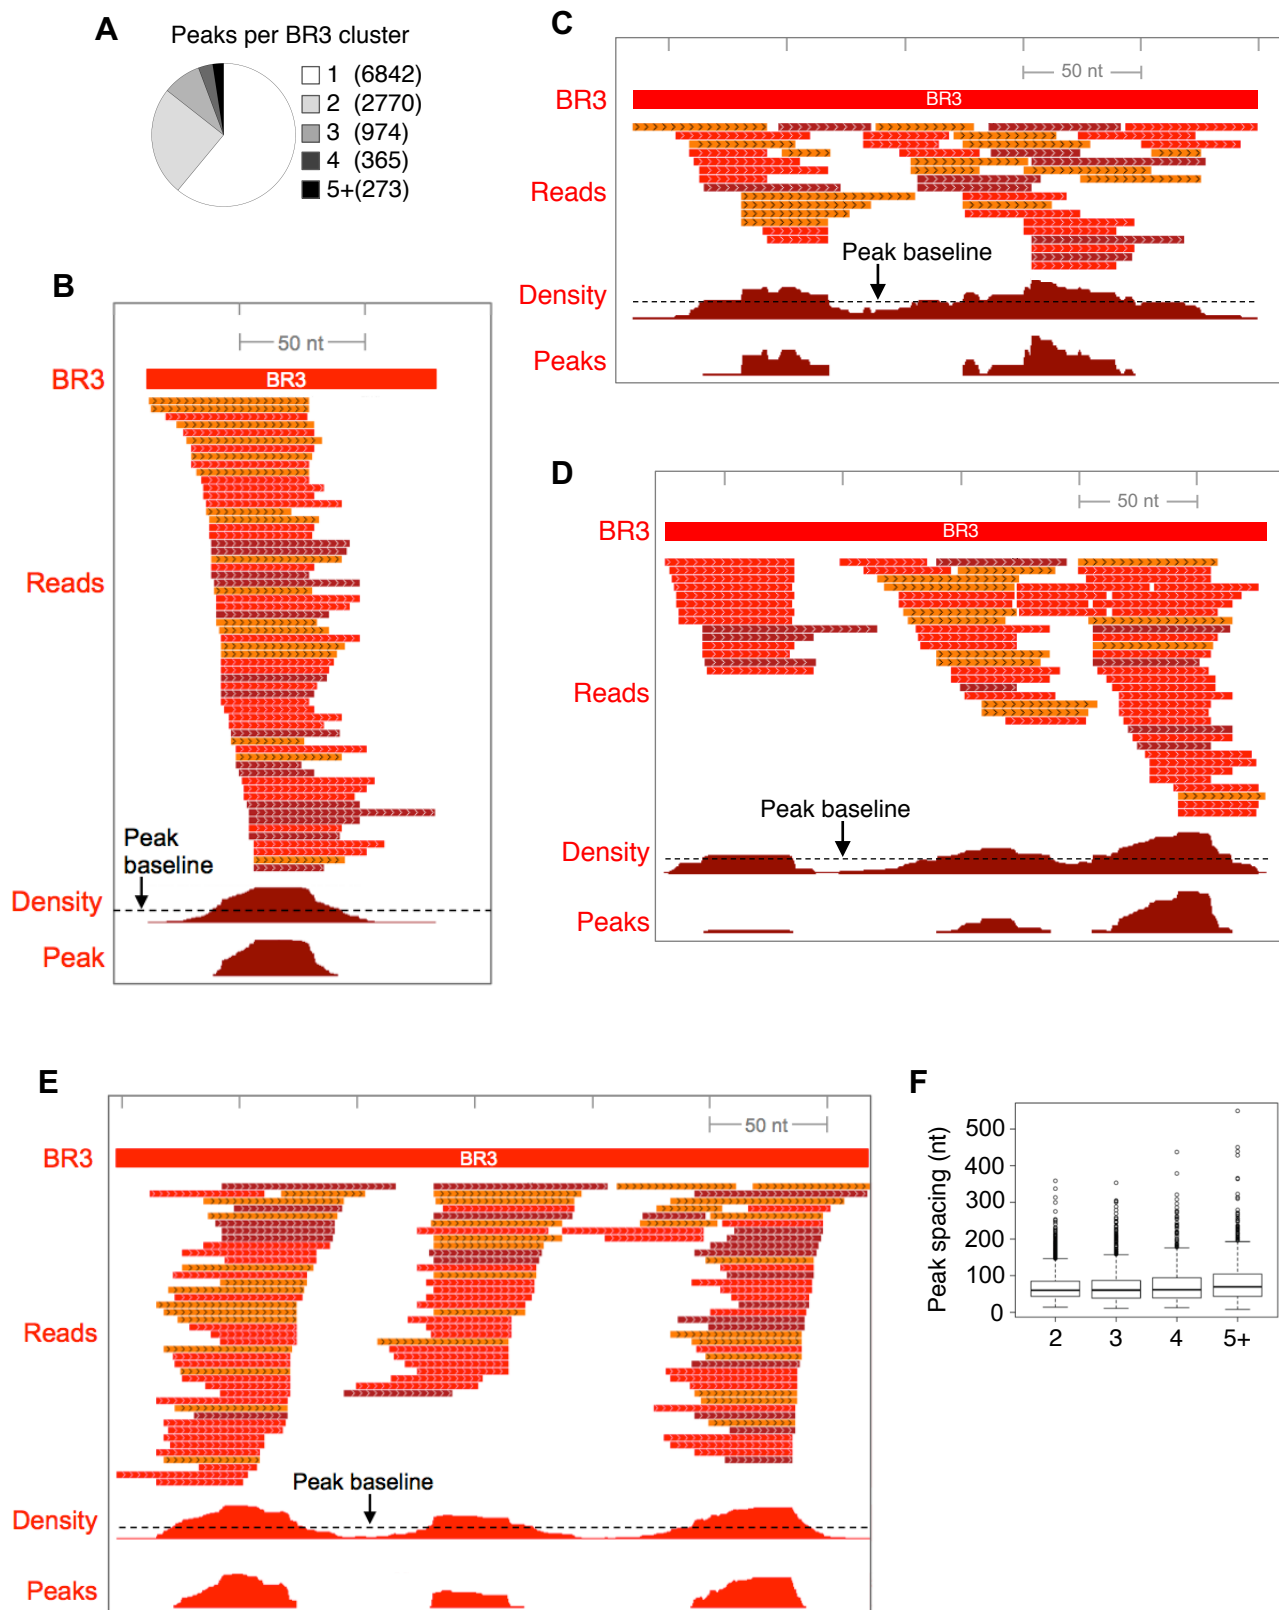

**Figure S1. Identification and analysis of DAZL BR3 CLIP peaks, Related to Figure 1.** (A) Number of BR3 clusters with different numbers of peaks. BR3 clusters containing one (B), two (C), or three (D, E) peaks are shown. The footprint of the BR3 region is shown at the top. Reads are color coded to reflect each of the three CLIP libraries sequenced. Density indicates the number of overlapping reads per nucleotide within the BR3 region. Peak baseline corresponds to the total number of CLIP bases in the cluster divided by the length of the cluster. Peaks correspond to regions where the CLIP density exceeds the peak baseline. (F) Distances between the midpoints of adjacent peaks in multi-peak clusters.

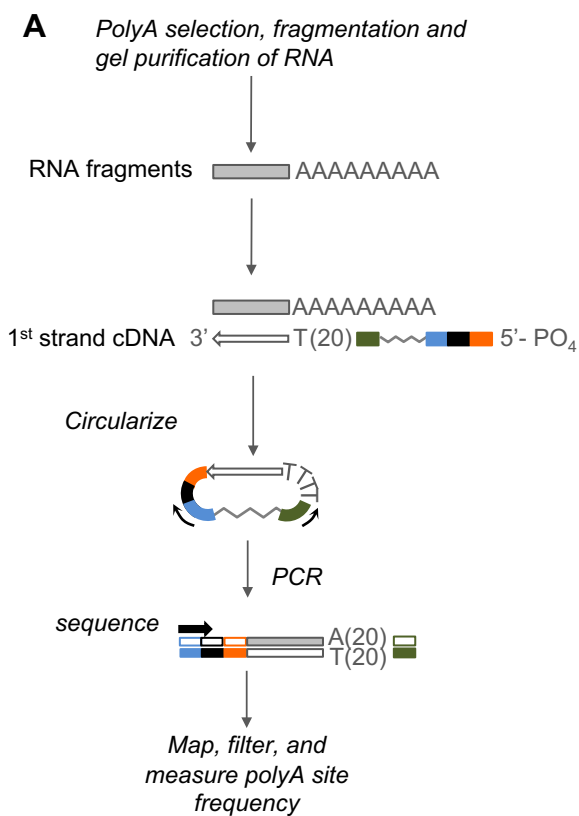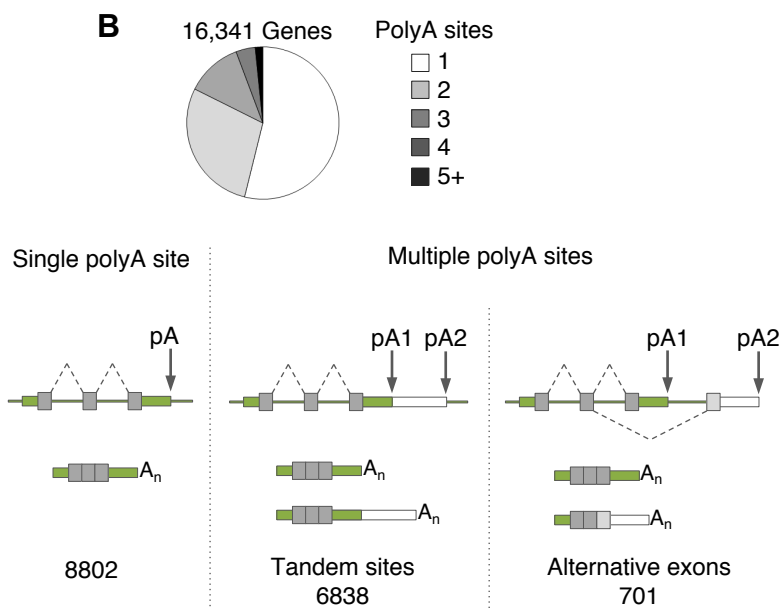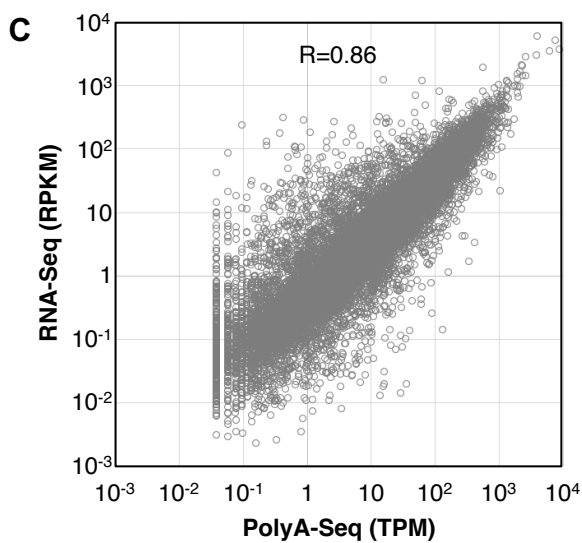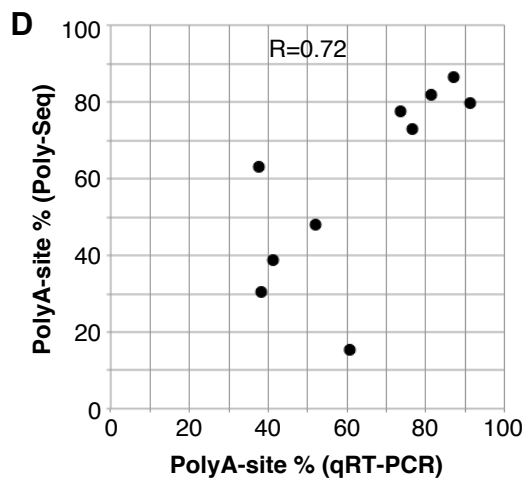

**Figure S2. Identification of testis 3'UTRs by PolyA-seq, Related to Figure 2.** (A) Overview of the PolyA-Seq library construction strategy. (B) Characterization of polyA site usage in different genes. (C) Comparison of RPKM and TPM values derived from RNA-Seq and PolyA-Seq, respectively, from adult testes. (D) Comparison of proximal polyA site estimates from qRT-PCR and PolyA-Seq.

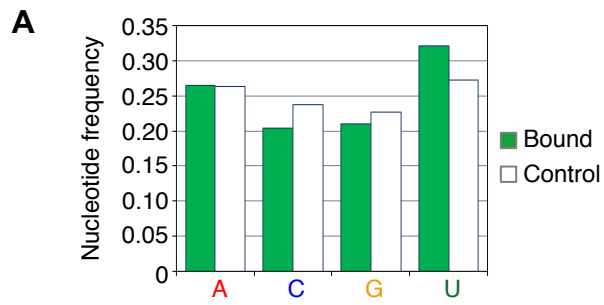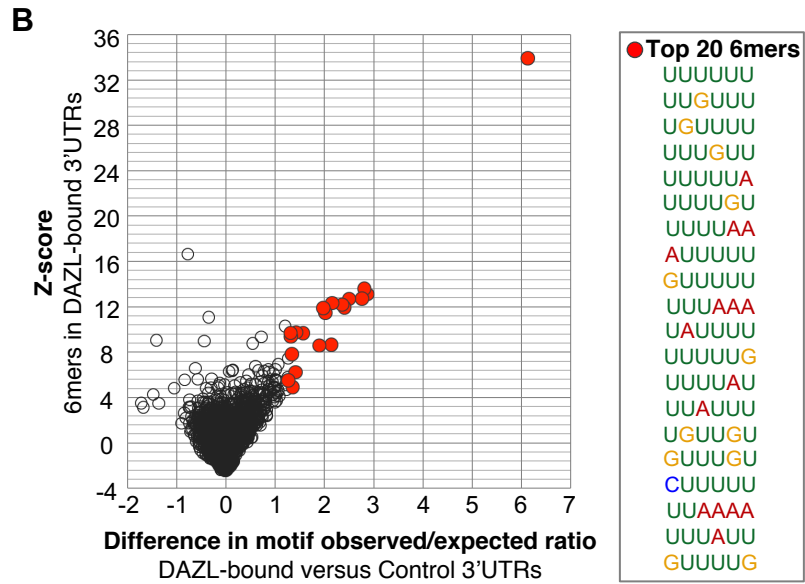

**Figure S3. Features associated with DAZL-bound and control 3'UTRs, Related to Figure 2.** (A) Nucleotide frequency in the last 500 nucleotides of 3'UTRs with DAZL BR3 sites (n=2022) and control 3'UTRs that have no CLIP tags (n=3771). (B) Enrichment of 6-mers present in the 3'UTRs of genes with DAZL-3'UTRs compared to control genes. Each dot represents an individual 6 mer. X-axis corresponds to difference in observed-to-expected ratio for bound versus control 3'UTRs, while y-axis corresponds to the enrichment z-score for the 6-mer in the DAZL-bound 3'UTRs. Shown at right are the top 20 6-mers ranked by difference in the observed-to-expected ratios between bound and control 3'UTRs.

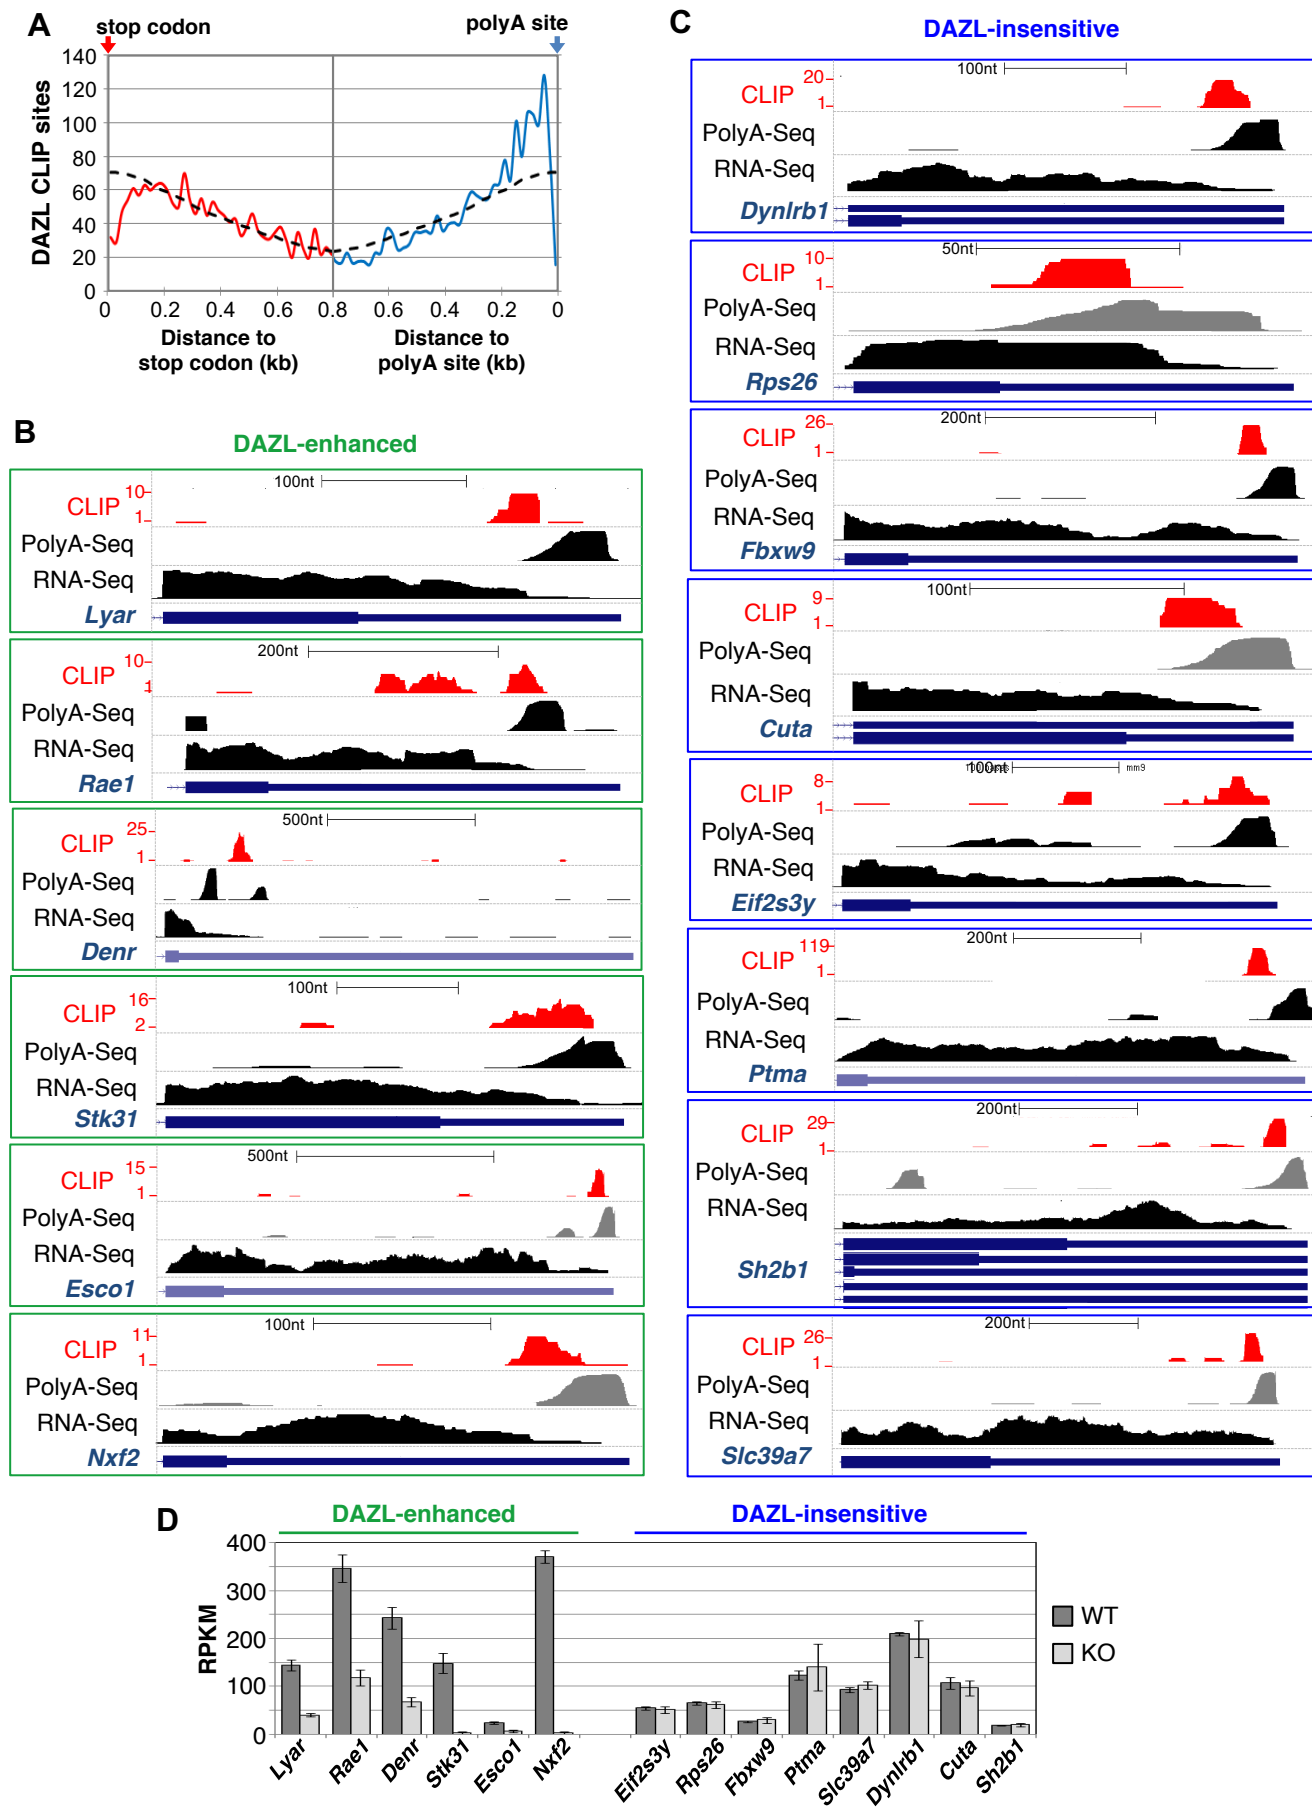



**Figure S4. Examination of P6 DAZL-RNA binding in 3'UTRs, Related to Figure 4.** (A) Metagene analysis of the distribution of BR3 DAZL-RNA sites (from P6 iCLIP) in 3'UTRs of spermatogonial-expressed 3'UTRs (as in Figure 2C). Genome browser images showing P6 BR3 CLIP sites in 3'UTRs of DAZL-enhanced and DAZL-insensitive genes (B and C, respectively). Adult PolyA-seq and RNA-Seq tracks are also shown. CLIP scale denotes the maximum number of overlapping CLIP tags in the region shown. (D) Average RPKM values and standard deviations for the genes shown in panels (A) and (B).

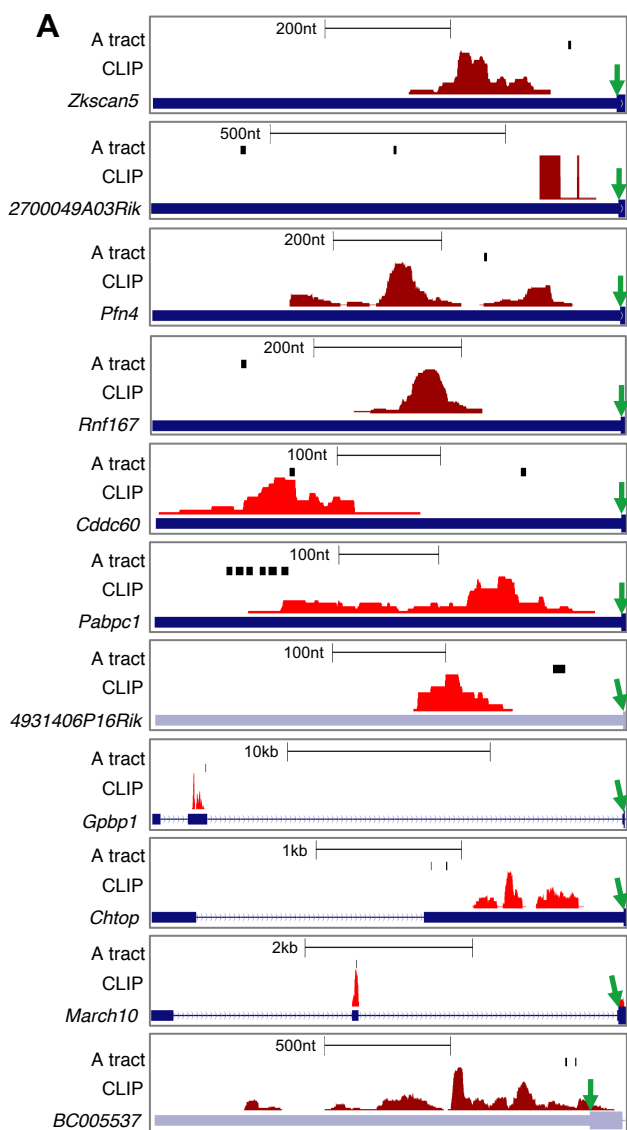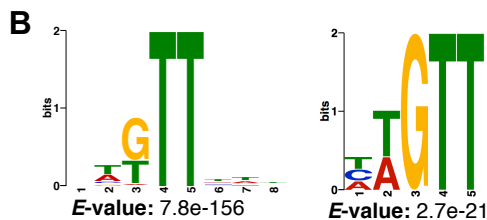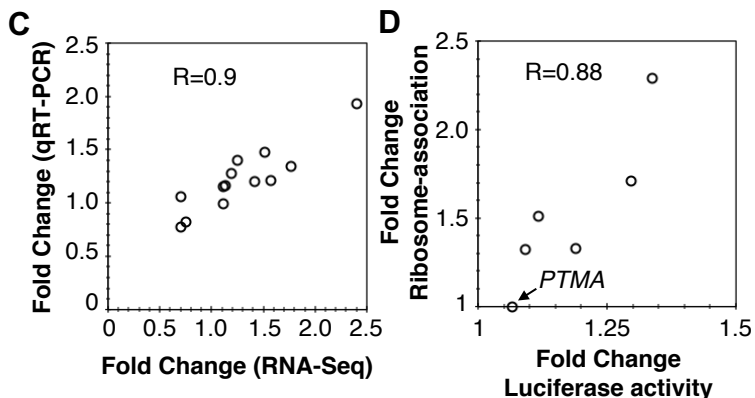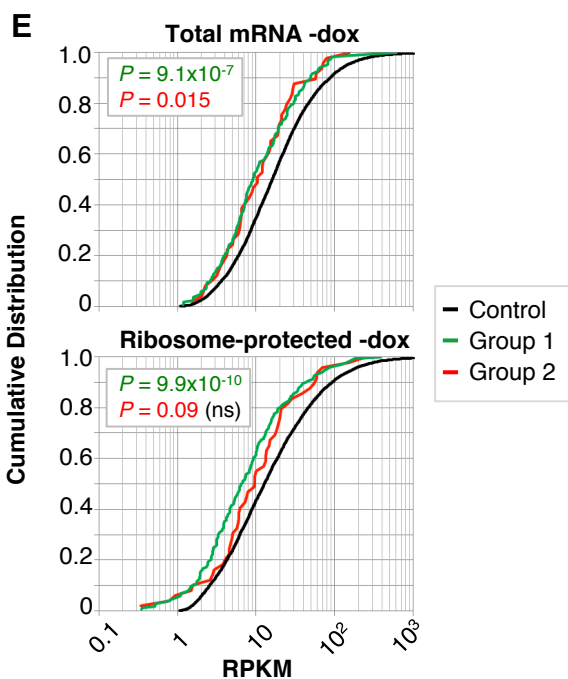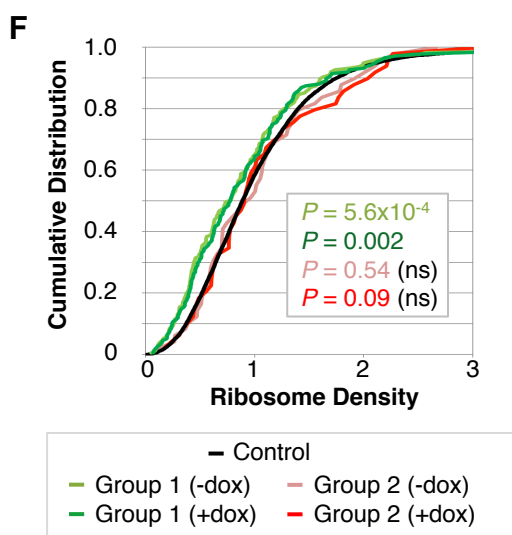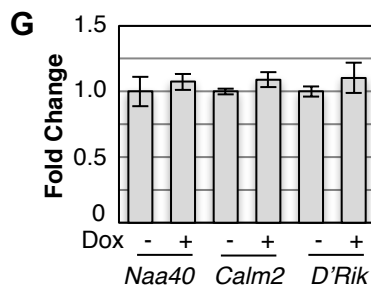

**Figure S5. DAZL binding in 5'UTRs and consequences of DAZL expression in GC-1 spg cells, Related to Figures 5 and 6.** (A) Genome browser images of 11 5'UTRs with DAZL BR3 CLIP clusters (adult testis) and polyA tracts of 5 A's or more. PolyA tracts indicated by black boxes. Green arrows denote the start codon. (B) The most significant motifs (identified by the programs MEME and DREME, left and right respectively) in 10nt regions centered at the 5' end of DAZL BR3 CLIP sites from GC-1 spg cells. (C) Comparison of dox-induced RNA level fold changes determined by qRT-PCR and RNA-Seq (13 genes represented). (D) Comparison of dox-induced fold changes in luciferase activity for mRNA reporters bearing different 3'UTRs (x-axis) versus fold changes in ribosome-association for the corresponding endogenous transcripts determined by deep sequencing (y-axis). (E) Cumulative distribution of RPKM values for control, Group 1 (enhanced), and Group 2 (repressed) genes (black, green, red lines, respectively) in untreated GC-1 spg cells. *P* values (Wilcoxon rank sum test) correspond to pairwise comparisons of Group 1 (green) or Group 2 (red) RPKM values to control. (F) Cumulative distribution of ribosome density values for Group 1 and 2 genes before and after dox-treatment. Ribosome density is the ratio of RPKM values from ribosome-protected fragments to total RNA for each gene. (G) qRT-PCR analysis of pre-mRNA levels following dox treatment relative to pre-mRNA levels in untreated cells. Error bars represent standard deviations for three technical replicates per gene.



**Figure S6. Clusters of enriched GO terms associated with *Dazl*-enhanced genes, Related to Figure 3. (A)**  
Hierarchical clustering of enriched GO terms ( $P < 0.01$ ) and genes associated with the set of 1462 genes that have decreased RNA levels in *Dazl* KO cells. Twenty clusters of related terms are shown at left, and different groups of genes (A-N) shown at the bottom.

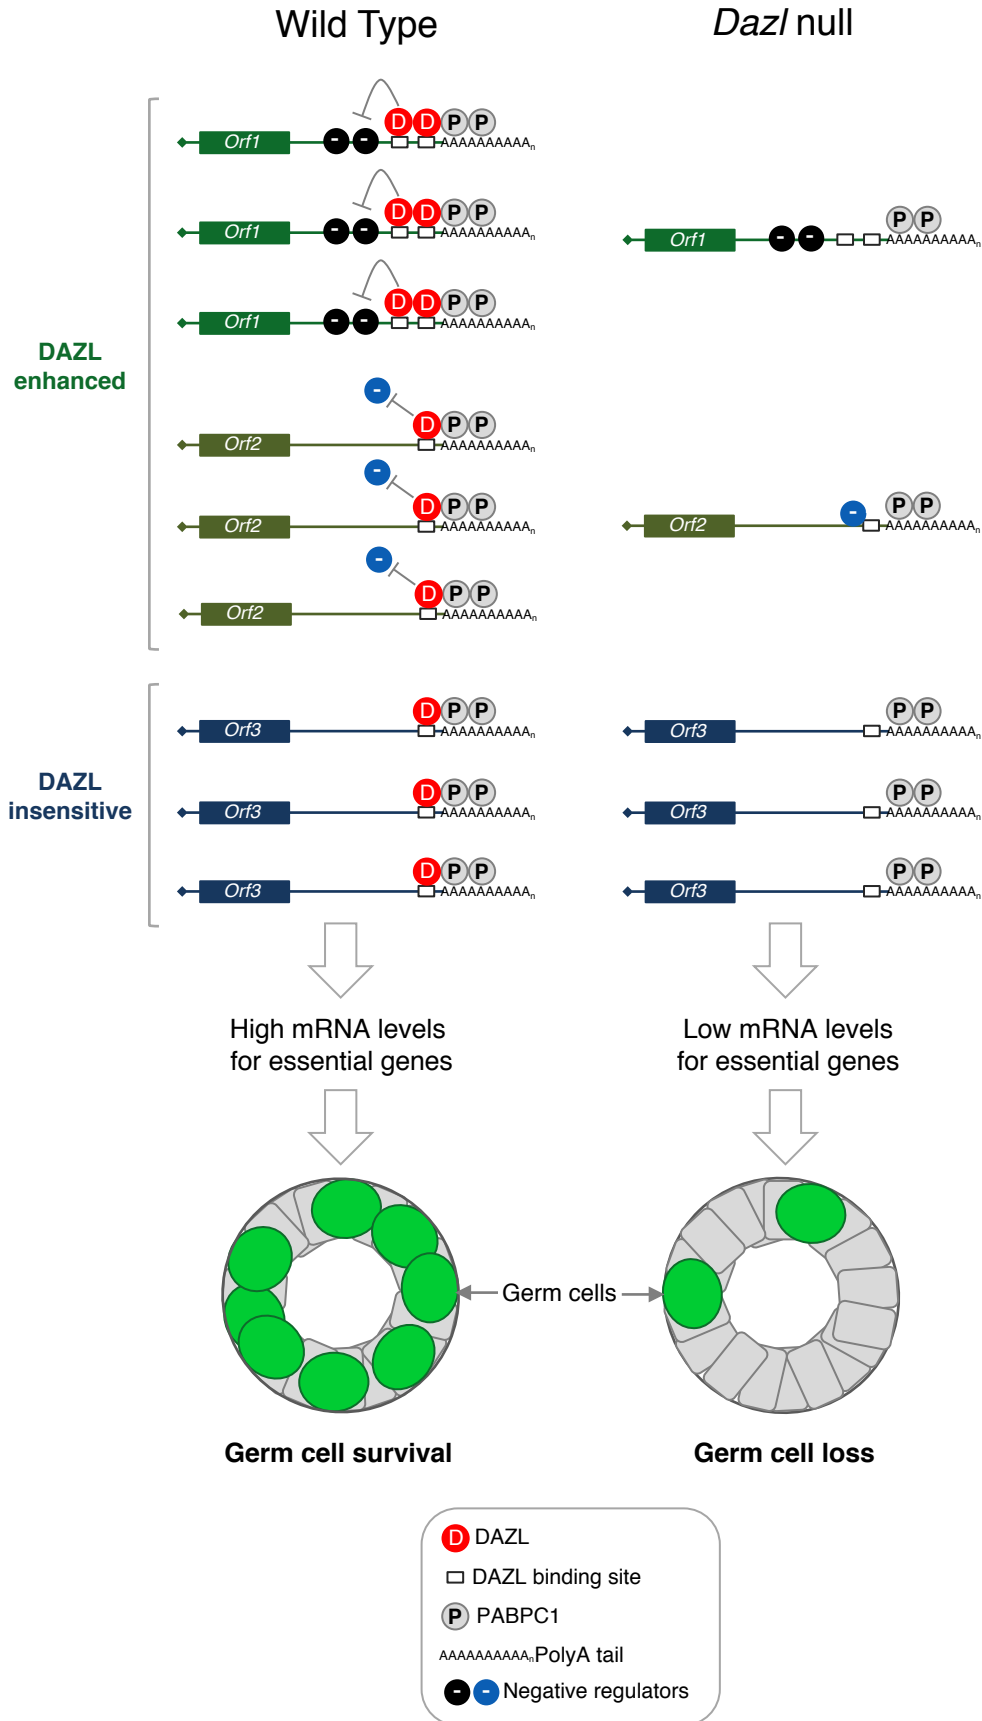

**Figure S7. Proposed model for *Dazl*-dependent germ cell maintenance, Related to Figures 1 to 7.** DAZL binds a broad set of mRNAs via polyA-proximal GUU interactions facilitated by Pabpc1-polyA interactions. DAZL maintains high mRNA levels for select targets (*Orf1* and *Orf2*), potentially by blocking the function or binding of negative regulatory factors. In the absence of DAZL, *Orf1* and *Orf2* mRNAs are reduced, whereas *Orf3* mRNAs (not subject to negative regulation) are unaffected.

9524 / 11297 map to annotated genes in RefSeq

237 map to non-coding RNAs  
("NR\_" RefSeq IDs)225 map to overlapping coding and non-coding RNAs  
("NR\_" and "NM\_" RefSeq IDs)9062 map to protein coding genes  
("NM\_" RefSeq IDs only)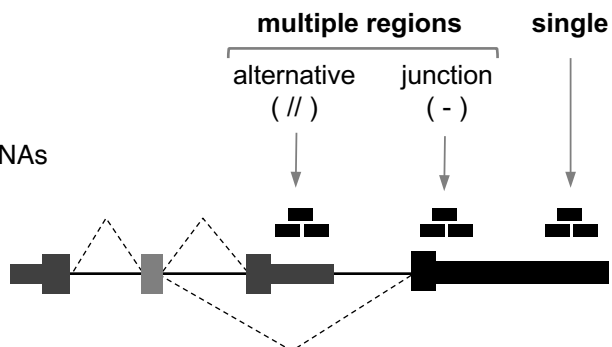

| Genic location                 | BR3 Clusters | % BR3 | 5'UTR | 3'UTR | CDS | Intron |
|--------------------------------|--------------|-------|-------|-------|-----|--------|
| 3UTR                           | 6397         | 70.59 |       | 6397  |     |        |
| 3UTR // 5UTR                   | 3            | 0.03  | 3     | 3     |     |        |
| 3UTR // CDS-3UTR               | 10           | 0.11  |       | 10    | 10  |        |
| 3UTR // CDS-INTRON             | 1            | 0.01  |       | 1     | 1   | 1      |
| 3UTR // INTRON                 | 157          | 1.73  |       | 157   |     | 157    |
| 3UTR // INTRON-3UTR            | 5            | 0.06  |       | 5     |     | 5      |
| 3UTR // INTRON-CDS-3UTR        | 3            | 0.03  |       | 3     | 3   | 3      |
| 3UTR-INTRON                    | 1            | 0.01  |       | 1     |     | 1      |
| 5UTR                           | 57           | 0.63  | 57    |       |     |        |
| 5UTR // CDS                    | 1            | 0.01  | 1     |       | 1   |        |
| 5UTR // INTRON                 | 7            | 0.08  | 7     |       |     | 7      |
| 5UTR-CDS                       | 37           | 0.41  | 37    |       | 37  |        |
| 5UTR-CDS // INTRON             | 3            | 0.03  | 3     |       | 3   | 3      |
| 5UTR-CDS // INTRON-5UTR-CDS    | 3            | 0.03  | 3     |       | 3   | 3      |
| 5UTR-CDS-INTRON                | 3            | 0.03  | 3     |       | 3   | 3      |
| 5UTR-INTRON                    | 4            | 0.04  | 4     |       |     | 4      |
| CDS                            | 741          | 8.18  |       |       | 741 |        |
| CDS // 3UTR                    | 1            | 0.01  |       | 1     | 1   |        |
| CDS // INTRON                  | 16           | 0.18  |       |       | 16  | 16     |
| CDS // INTRON-CDS              | 1            | 0.01  |       |       | 1   | 1      |
| CDS-3UTR                       | 775          | 8.55  |       | 775   | 775 |        |
| CDS-3UTR // CDS-3UTR-INTRON    | 2            | 0.02  |       | 2     | 2   | 2      |
| CDS-3UTR // CDS-INTRON         | 4            | 0.04  |       | 4     | 4   | 4      |
| CDS-3UTR // INTRON             | 15           | 0.17  |       | 15    | 15  | 15     |
| CDS-3UTR-INTRON                | 5            | 0.06  |       | 5     | 5   | 5      |
| CDS-INTRON                     | 226          | 2.49  |       |       | 226 | 226    |
| INTRON                         | 340          | 3.75  |       |       |     | 340    |
| INTRON-3UTR                    | 10           | 0.11  |       | 10    |     | 10     |
| INTRON-3UTR // INTRON-CDS-3UTR | 1            | 0.01  |       | 1     | 1   | 1      |
| INTRON-5UTR                    | 2            | 0.02  | 2     |       |     | 2      |
| INTRON-5UTR // 5UTR            | 1            | 0.01  | 1     |       |     | 1      |
| INTRON-5UTR-CDS                | 6            | 0.07  | 6     |       | 6   | 6      |
| INTRON-5UTR-CDS-INTRON         | 3            | 0.03  | 3     |       | 3   | 3      |
| INTRON-5UTR-INTRON             | 1            | 0.01  | 1     |       |     | 1      |
| INTRON-CDS                     | 126          | 1.39  |       |       | 126 | 126    |
| INTRON-CDS // 3UTR             | 2            | 0.02  |       | 2     | 2   | 2      |
| INTRON-CDS // INTRON-CDS-3UTR  | 1            | 0.01  |       | 1     | 1   | 1      |
| INTRON-CDS-3UTR                | 62           | 0.68  |       | 62    | 62  | 62     |
| INTRON-CDS-3UTR-INTRON         | 1            | 0.01  |       | 1     | 1   | 1      |
| INTRON-CDS-INTRON              | 28           | 0.31  |       |       | 28  | 28     |



**Supplemental Table 1. Annotation of 11,297 BR3 clusters in RefSeq fragments, Related to Figure 1.** Clusters that overlap two different fragments in the same transcript (such as coding and UTR sequence) are denoted with “-“. Clusters that map to positions with alternative annotations (such as intron in one isoform and exon in another) are denoted with “/”.
